# Supplementary material for: Multi-year precipitation characteristics based on in-situ and remote sensing observations at Ny-Ålesund, Svalbard
Source: Copernicus journal article supplement (doi:10.5194/egusphere-2024-3368), 2024-11-13
Supplement: Supplementary file [file egusphere-2024-3368-AC1-supplement.pdf]

We thank the anonymous reviewers and Hans-Werner Jacobi for their time in reviewing this manuscript. We very much appreciate the thorough reading and providing us with very constructive comments that improved the present work. In the following, the answers to the reviewers' comments and questions are given in red. Line numbers refer to the original version of the script and may have changed in the revised version.

## Comments by reviewer 1

The manuscript entitled “Multi-year precipitation characteristics based on in-situ and remote sensing observations at Ny-Ålesund, Svalbard”, present precipitation detection and measurements by several methods in the period 2017-2021 in Ny Alesund and show how atmospheric circulation (AR, cyclones, front) impacts the precipitations events. I think the paper addresses very important questions in an area of rapid change in the context of global warming. The paper is generally well written and the figures are clear and of good quality. However, I think the quality of the paper can be greatly improved by focusing on more specific questions, reorganizing a bit the different parts and expending on the discussions.

First, the introduction is very informative with a lot of cited literature. You introduce well the need of improving ground based observations. However, the connection between the previous studies, the need of new observations for precipitation in Ny Alesund, and the new measurements that you describe is not clear. What are exactly the measurements that were missing before the instruments were installed and how these new measurements can improve our knowledge on Ny Alesund precipitation? the questions that you mention in the introduction: “How much precipitation falls at Ny-Ålesund, and how is it related to the previously mentioned weather systems? What type of precipitation occurs? How often does it precipitate?” have been already addressed in previous studies. You need to point out what these new measurements are adding to the previous answers to these questions and what is new in your way of relating the precipitation events to weather systems. In summary, you need to be more specific on how these new measurements can help answer your research questions.

We have changed the focus of the study and reorganized the manuscript correspondingly. We concentrate now on the Parsivel and Pluvio measurements, leaving out the Micro Rain Radar data since they did not significantly contribute to the study. We expanded the analysis on specific weather events, i.e. atmospheric rivers, cyclones and fronts, and their contribution to precipitation at Ny-Ålesund, which has not been addressed in previous studies yet.

The research questions are now:

- Can the Parsivel constrain a temperature-based mass separation of precipitation into solid and liquid precipitation? How do occurrence and mass fraction depend on temperature?
- How are precipitation amount and type related to large-scale synoptic systems like ARs, cyclones and fronts?
- Which role do these systems play in extreme precipitation events?

We hope that the storyline and the motivation are now clearer.

Since the focus of the paper changed quite a bit we also changed the title to:  
“Impact of weather systems on observed precipitation at Ny-Ålesund (Svalbard)”

Second, I suggest reorganizing the manuscript, because in the present form, the flow of ideas is a bit confusing. I really like the part on explaining the weather patterns origins of precipitation events, but it comes too early in the manuscript. I suggest first introducing the results of the measurements (quantity of precipitation, types, frequency), and then the large-scale weather patterns. The advantage of this organization would be that you can use your previous results on separating snow and rain to study the role of weather patterns on rain and snow events. Summer rain, winter rain (rain and snow) and snow, have very different implications for other research studies and local communities, so it would be extremely interesting to use the pluvio and parsivel measurements to study the specific origins of rain and snow. This analysis would be an application of your method of separating rain and snow. Regarding the part on frequency and the use of MRR, I don't really see the benefit on this study. It needs to be better explained or to be removed from the analysis.

We have reorganized the manuscript. We present first the measurements and their uncertainties in more detail before focusing on the weather system analysis. As suggested, we also removed the MRR analysis as it did not add much further information in the way we incorporated the data. We will exploit the MRR measurements in more detail in future studies.

Finally, your article lacks a discussion part where you talk about previous studies and show how the new measurements may improve the previous studies. Many articles are already cited in the introduction but they don't serve your discussion in the current version of your manuscript. You have some discussion spread in the manuscript, but it would be good to write a specific discussion section and expand on them.

By changing the focus and reorganization of the manuscript, we hope that the link to previous studies is also clearer now. We tried to better incorporate the discussion parts. We find that it is more natural to discuss the results when they are presented. This is why we do not have a separate discussion section. However, we also extended the discussion in the summary and conclusions section since this also directly motivates the needs and ideas for upcoming studies.

I think this manuscript have a great potential to get published after major revision, and is a very important step in improving our precipitation knowledge in Ny Alesund.

Thank you

Here are some specific comments:

I suggest changing the title to “Multi-year precipitation characteristics based on in-situ and ground-based remote sensing observations at Ny-Ålesund, Svalbard”.

Since we changed the focus of the manuscript we changed the title to:  
“Impact of weather systems on observed precipitation at Ny-Ålesund (Svalbard)”

I.11 «Cyclones contributed 40% (21%) of the total precipitation amount if all (separated) cyclone events are considered ». This sentence is not clear to me.

We rewrote the abstract. The sentence now reads, “ARs occurred only 8% of the time at Ny-Ålesund but contributed to about 42% of the total precipitation amount with a high liquid mass fraction (72%).”

Note that the numbers slightly changed since we found a coding error in reading the Pluvio data.

I.13-14: I am not sure this is needed. Of course the occurrence is lower when the resolution is 1 minute compared to daily. What is the resolution of micro rain radar?

We removed this result from the abstract but included it in the instrument section. We think that it is important to understand the sensitivities of the different instruments which might also affect statistics as precipitation occurrence.

I. 32-40 maybe separate what is observed in the past and what is modeled in the future, it is bit mixed up here. There is already literature on past increase of precipitation and rain in the Arctic that you can include.

We revised this section and first mention studies of detected precipitation changes using observations and reanalyses. At the end of the section, we refer to the results of climate projections.

I. 60-61 «melt days in winter in Svalbard and the associated precipitation sums have increased» not sure I understand what are precipitation sums and how it is associated to melt.

We rephrased the sentence:

“Vikhmar-Schuler et al. (2016) further showed that the occurrence of melt days, i.e. days with temperature  $>0^{\circ}\text{C}$ , and the accumulated precipitation during these events have increased in Svalbard in winter.”

I. 61 «These rain-on-snow events». I would say «the rain on snow events» since you don't talk about rain-on-snow events previously.

We rephrased the sentence:

“Rain-on-snow events, which have implications for the cryosphere, ecosystem and infrastructure, have also been studied in further detail (e.g., Hansen et al., 2014, 2019; Peeters et al., 2019; Xie et al., 2024).”

I.77-78: this sentence can be simplified. you say three time the same thing: «model data» «from numerical weather prediction models»and «climate simulations».

We removed this paragraph in the revised version.

I.104: operated by?

corrected

I.140 What is the resolution of parsivel?

We added this information:

“The OTT present weather sensor Parsivel2 is an optical laser disdrometer. It provides information on fall speed, size and type of precipitating particles in 1 min temporal resolution.”

I.164: what is the horizontal resolution of the MRR?

We removed the MRR from the manuscript. To answer your question: The antenna opening angle (beam width at half maximum) is 1.5°. This means that the horizontal resolution is about 3 m at 120 m height, and 26 m at a height of 1 km.

I.188-189: you can just say june to september

Changed to:

“In general, daily mean T2m values are above 0°C from June to September and rarely exceed 10°C (Fig. A2).”

I.231 it seems that the underestimation of your pluvio data compared to MET norway is larger in winter months. It would be interesting to also show the average difference per month.

We included also a time series with the monthly differences in Fig. 4 and scatter plots of monthly and daily values in Fig. A3, where we also provided bias, RMSD, standard deviation and correlation. We discussed the differences in more detail and also incorporated the corrected MET Norway precipitation values (ensemble correction) by Champagne et al. (2024) as suggested. See new section 3.1.

I. 232-23 you can use the precipitation correction of the MET Norway time series by several methods here <https://www.easydata.earth/#/public/metadata/a3d7b9e6-9626-4d43-bb83-623900eb1053>. It would be good to include them in table 1 and figure 2. I suggest also to show a scatter plot with corrected MET norway vs corrected pluvio for daily values.

See previous reply.

I.257: methodology of?

“by” is also possible

Table 2: AR-CY not AR-CA. The results are strongly dependent on the occurrence of these weather patterns. It would be good if overall occurrences appear somewhere.

We have added a column with the total occurrence from August 2017 to December 2021 in Fig. 7 and explicitly mention these values as well as the yearly values in Table 4.

I.259: you mean a monthly maxima?

Yes, we corrected it to “monthly maxima”.

Figure 4: it also seems that the combined AR-CY don't happen frequently but are associated to a lot of precipitation. I think this needs to be discussed.

We highlight this point in the revised version:

“Even if the occurrence of ARs is rather low on average (4% for O-AR, 8% for all ARs), they contribute 22% (O-AR) and 42% (all AR) to the total precipitation, respectively. The relatively rare combined classes AR-FR (2%), AR-CY (1%) and AR-CY-FR (1%), contribute together 20% of the total precipitation amount.”

I.264-266: I think you should discuss the specific months after discussing the general behavior.

We changed the order to discuss first the general behavior.

“The largest contributions to monthly and yearly precipitation can be found for the AR and cyclone classes. Even if the occurrence of ARs is rather low on average (4% for O-AR, 8% for all ARs), they contribute 22% (O-AR) and 42% (all AR) to the total precipitation, respectively. The relatively rare combined classes AR-FR (2%), AR-CY (1%) and AR-CY-FR (1%), contribute together 20% of the total precipitation amount. However, the year-to-year and month-to-month variability of the precipitation fraction associated with ARs is large, with only 25% in 2021 and even 50% in 2018. In particular, in the very wet month of September 2017, almost all precipitation, i.e., 145 mm (Fig. A5), can be related to the (co-)occurrence of ARs. For the month with the highest precipitation amount, i.e., November 2020, both AR and cyclone classes contribute together to about 80% of the total precipitation amount, with the O-CY class even dominating.”

Figure 5: it would be better to write the bins in the x axis: [-0.5-0.5], [0.5-1.5], [0.5-1.5]... because I am not sure what bin corresponds to each point here. For example, does 0 corresponds to [-0.5-0.5]?

Since the space along the x-axis is not sufficient, we added this information in the caption of Fig. 5 and explicitly listed the values of the “phase transition regime” in Table 2.

I.276: I question the choice of including hail in solid precipitation as snow and hail are driven by very different processes and may not occur in the same season.

We have added a comment on this in the text:

“We included “graupel” and “hail” in the solid class even though the microphysical processes might be quite different in these cases. However, the occurrence of these two classes is very low (<1.9% for graupel and <0.001% for hail) and does not impact the key findings.”

I. 280 I think MET Norway also gives the type of precipitation: snow, liquid, mixed. It may be good to compare with this. And also to compare with snow-rain separation done by Champagne et al. 2024 using a threshold of 1°C (dataset above). I think your study as the potential to determine more precisely a threshold for solid vs liquid precipitations that can validate previous datasets or be used in future studies. It is great and can be emphasize in your manuscript.

We included a discussion on using a threshold of 1°C as used in Champagne et al. (2024) in the analysis. See also Fig. 6b and Table 3.

lines 320-331

“We also analyzed the effect of using a simple temperature threshold (TS1°C) assuming all precipitation to be solid for temperatures <1°C as in Champagne et al. (2024) (Fig. 6b). For some months, this significantly increases liquid precipitation (by up to 53 mm) resulting in generally higher yearly liquid precipitation fractions with an additional six to 15 percentage points (Table 3). Using only the temperature-based mass separation (TMS) as derived from the Parsivel observations (and thus no direct Parsivel observations at all), has a smaller effect, even though for some months differences are several millimeters showing still the uncertainty related to phase attribution. However, the yearly liquid mass fraction of the TMS method is similar to the combined Parsivel/TMS method (Table 3).

Since Champagne et al. (2024) applied the 1°C temperature threshold to hourly mean 2 m temperature values, we also calculated hourly liquid and solid precipitation sums from the 1 min resolved liquid and solid values of the combined Parsivel/TMS method and set those in context to hourly mean 2 m temperatures (Fig. A4). Also, for hourly averaged 2 m temperatures and hourly accumulated liquid and solid precipitation sums, we find a similar temperature dependency for the mass separation as shown in Fig. 5b.”

However, we did not use any further MET Norway data as we just used the data set provided by Jacobi et al. (2024). However, it is definitely interesting to look further into the phase separation of other data sets in the future. As for the Geonor data, we would postpone this to a later stage since this should be done in collaboration with MET Norway.

I.283 «this makes sense» is a bit familiar. Temperature is mostly used because there is no alternative and because temperature and precipitations are often long records measured together. In my opinion, what is very relevant your study is that the temperature threshold can be validated.

This paragraph is obsolete in the revised version.

I.285: When you say 2°C you mean the 1.5°C-2.5°C bin? Since you use a 1 minute resolution, with a lot of data available, I would suggest using more bins, at least for critical temperature between 0 and 3°C (0.1°C wide bins?). You can then arrive with a suggestion of thresholds (or a ranged threshold) separating solid, liquid and mixed precipitation.

We revised the phase discrimination in the revised version, distinguishing only liquid and solid precipitation. See section 3.2. The temperature bins have been refined to 0.2°C.

I.293-294: Not sure I understand when you say «during periods when solid precipitation has been detected by Parsivel as well (not shown)». parsivel have shown mixed precipitation during these events then?

Parsivel has detected in some minutes solid precipitation and in some other minutes liquid precipitation.

We rewrote the sentence:

“Looking at these cases in more detail reveals that all these situations occur during periods when solid precipitation only has been detected by Parsivel in other minutes (not shown).”

I.294: what the size of particle infers for the type of precipitation? Expend on that.

We rearranged this paragraph so that the reasoning is clearer now:

“Visual inspection of the pictures of the particles taken by VISSR for a case on 5 May 2023 showed that only solid precipitation was present (Maximilian Maahn, University of Leipzig, personal communication 25 August 2023). Interestingly, Chellini et al. (2022, 2023) found that low-level mixed-phase clouds at Ny-Ålesund produce small fast-falling ice particles in this temperature regime, which could be misinterpreted as drizzle. The detected Parsivel particle sizes are relatively small during these cold "liquid" events, with a mean volume equivalent diameter of 1.3 mm only. We thus assume that the Parsivel algorithm falsely classifies these smaller solid particles in this temperature regime as "rain" or "drizzle".”

I.314-315: I think the thresholds for mixed precipitation can be refined. Looking at figure 5, more than 90 % of precipitation is only solid below 0°C and only liquid above 3°C. Keep in mind that for most studies mixed precipitation is a useless variable. For most fields, we must know if snow is falling and sticking to the ground or if the precipitation are liquid (or almost liquid at the surface). The Parsivel is a very powerful tool that should be used at its best capacity to refine the temperature threshold between liquid and solid precipitation.

We agree that a mixed-phase precipitation class is not helpful here. We revised the classification procedure. See also Section 3.2 for more details.

“We took all corrected 1 min resolved Pluvio precipitation values larger than 0 mm into account, for which also the Parsivel had detected a precipitation signal within  $\pm 10$  min. The Pluvio precipitation signal was then declared as solid if the classes "snow", "snow grains", "graupel" and "hail" were the dominating precipitation types within the  $\pm 10$  min interval. We included "graupel" and "hail" in the solid class even though the microphysical processes might be quite different in these cases. However, the occurrence of these two classes is very low ( $<1.9\%$  for graupel and  $<0.001\%$  for hail) and does not impact the key findings. If the liquid Parsivel classes "drizzle", "drizzle with rain", or "rain" was dominating, the Pluvio precipitation amount was associated with liquid precipitation. In a few cases (0.7% of all cases), mixed-phase precipitation ("rain, drizzle with snow") was dominating the Parsivel signal. Here, half of the Pluvio precipitation amount was attributed to solid and half to liquid precipitation. However, since these cases contribute only 0.7% to the total precipitation amount they do not significantly affect the results. The occurrence of liquid and solid precipitation was then analyzed as a function of 2 m temperature.  
[...]

To split precipitation into solid and liquid for the whole period August 2017 to December 2021, we applied a combined Parsivel/temperature-based mass separation (TMS) method: for temperatures  $<0.2^{\circ}\text{C}$ , we assume all precipitation to be solid. All precipitation is assumed to be liquid for temperatures  $\geq 3.6^{\circ}\text{C}$ . For the temperature range in-between, we check first if Parsivel detected precipitation within  $\pm 10$  min and if wind speeds are  $< 5 \text{ ms}^{-1}$ . If this is the case, we use the Parsivel classification, as explained earlier, to discriminate between liquid and solid and attribute the precipitation mass correspondingly. If precipitation phase information is not available from Parsivel due to no or no valid Parsivel data (in particular in 2021; cf. Fig. A1b), due to no detected precipitation by Parsivel, or due to wind speeds  $\geq 5 \text{ ms}^{-1}$ , the 2 m temperature is used for the mass separation as shown in Fig. 5b) (for the exact values see Table 2). In some cases, no temperature measurements were available, so the precipitation phase could not be determined for the corrected Pluvio precipitation amounts. However, this affected less than 2 mm of the whole precipitation amount in the period from August 2017 to December 2021.”

Figure 6: why for mixed phase the fraction of precipitation occurrence is way lower than the fraction of precipitation amount?

This part has been removed.

You could also look at the dataset from Champagne et al. 2024  
<https://www.easydata.earth/#/public/metadata/a3d7b9e6-9626-4d43-bb83-623900eb1053>  
and validate if a simple way of separating snow and rain (temperature threshold) can be done. your study can be very useful to validate such dataset.

We also checked the sensitivity of the liquid/solid partitioning by applying also the  $1^{\circ}\text{C}$  temperature threshold as used by Champagne et al. (2024). For the final liquid/solid precipitation sums in Champagne et al. (2024), differences might additionally arise due to the partitioning of solid and liquid precipitation of the 12 hourly resolved data using 12 hourly mean temperatures. We agree that it is interesting to compare this in more detail but would also postpone this analysis to a follow-up study.

I.323: «Since the mixed-phase precipitation type, as detected by Parsivel, only seldom occurs» awkward wording.

This part is obsolete.

I.326: I think you can reduce the number of unknown cases by narrowing down the threshold  $[-2-4^{\circ}\text{C}]$ .

Combining the Parsivel measurements with temperature information reduces the unknown cases.

“In some cases, no temperature measurements were available, so the precipitation phase could not be determined for the corrected Pluvio precipitation amounts. However, this affected less than 2 mm of the whole precipitation amount in the period from August 2017 to December 2021.”

I. 333 i don't see any analysis on ROS events.



We added an analysis of “liquid precipitation days”. We actually did not analyse rain on snow events since we are not sure about the surface state during the liquid precipitation event. See section 4 and Fig. 11

“Another type of “extreme” precipitation event is liquid precipitation during the cold season. As mentioned before, rain-on-snow events are of particular interest since they can have severe implications for wildlife and Arctic communities. We investigated the number of days with liquid precipitation >1 mm in each month and connected it to the occurrence of the different weather systems (Fig. 11). As expected, most of these days can be found from May to September when temperatures are predominantly above 0°C (Fig. A2). However, except for the relatively cold 2019/2020 winter (Fig. A2), liquid precipitation days are also common from November to April. Almost all liquid precipitation days are connected to at least one of the weather systems and all liquid precipitation days from November to April (22 in total). 91% of these days are connected to ARs and 64% and 45% to fronts and cyclones, respectively.”

I.345: >0mm or 1mm ?

This part has been removed in the revised version.

I.348-349 «To understand which rain or snowfall rate a value of -5 or -10 dBZ actually represents,  $Z_e - R$  and  $Z_e - S$  relationships must be applied » Not clear. Reformulate.

This part has been removed in the revised version.

I.370: Even though these frequencies serve different purposes, I think you still need to discuss a bit if these frequencies are plausible or not. The MRR frequency seems very high, but Pluvio rather low. What causes the overestimation in MRR and Parsival? Also expand on the purpose of these different measurements (maybe in a separate discussion part).

The MRR has been removed from the analysis. We moved this part to the instrument description as it is important to understand the different instrument sensitivities.

“Fig. 2b shows the frequency of detected precipitation by Pluvio. Using the 1 min resolved Pluvio time series results in monthly precipitation frequencies of up to 5% only and in all-time average values of 1%. Using daily accumulated Pluvio data increases the monthly precipitation frequency to 4%–63% and, if a threshold of 1 mm is applied, to 4%–46%. [...]

Compared to the 1 min resolved Pluvio measurements, the precipitation signal occurrence is much higher for Parsival (Fig. 2). For the whole period (August 2017 – December 2021), it is 8% (compared to the 1% of Pluvio). This is due to the fact that the Parsival already detects a few precipitating particles whose mass might not be large enough to be measured by the Pluvio.”

Table 4: I assume these are data from Pluvio? Are these raw or corrected data? It would be nice also to see the data from corrected Norway MET data.”

We added the corrected MET Norway data in Table 6 (table number changed). We simplified the extreme event analysis and analyzed daily values (Table 6 in the revised version). In the future, we will have a closer look at the temporal development of these events, exploiting also the various remote sensing observations. We clarified in the table caption that we use the corrected Pluvio data. We did not add the MET Norway data here since we analyze daily precipitation sums from 0-24 UTC. Comparing it with the 12 hourly resolved MET Norway data (06-18 UTC, 18-06 UTC) would result in sampling differences.

I.375-386: What is the main benefit of this MRR for precipitation detection? I don't really see it here. You are not really describing the vertical variability of the results and how it can be used. This needs to be discuss more.

We removed the MRR from the revised version.

I.393 not clear. You mean you need to have at least 30 minutes with a  $Z_e < -10\text{dBZ}$  (no precipitation) between two events?

We remove the MRR from the revised version.

I.394: an event interrupted by for example 12h without precipitation is also likely from the same weather system. So the 30 minutes needs to be better justified.

We simply used daily precipitation sums for the event analysis and changed the manuscript accordingly.

I.395 discussed later in another paper you mean? I don't see this discussion.

This part is obsolete in the revised version.

I.396-397 «Here, we extended the considered period by  $\pm 10$  min due to the spatial distance of the Pluvio and MRR measurements» you mean that rain may take 10 minutes to reach one site to another? This needs to be better explained.

This part is obsolete in the revised version.

I.403-406 I don't really understand the goal of figure 9.

This part is obsolete in the revised version.

I 410: «maximally contribute to the total precipitation amount with 11%» not clear

This part is obsolete in the revised version.

I.407-421: The results are interesting but I question what is the end goal of showing all these results. The longer and stronger events of course are more rare but give more precipitation amounts. What is new about it? What are the implications of these results? More generally I have hard time to see the benefit of using MRR here.

This part is obsolete in the revised version

I.424 A follow up study would be very interesting as your article leads to lot of new questions. I think it would be very interesting to separate the type of extreme events (summer rain, snow, rain on snow) and to focus on ROS events. It can be done here and would show a good application of pluvio-parsivel.

We added some statistics on liquid precipitation days, i.e. days with liquid precipitation >1 mm and connected them to the weather systems. See reply to comment I. 333.

I.464-472 I would first summarize your main results before introducing what may be done in the future

We rewrote the summary and conclusion section:

First, the results of the precipitation phase partitioning method are summarized followed by a discussion and outlook in this respect.

Then, the results of the weather system analysis are summarized, discussed and also here an outlook given.

We hope that the structure is clearer now.

I.473 replace small by low

Replaced.

I.483-485 I think from your results you can already give approximate temperature threshold for rain, snow and mixed precipitation at Ny Alesund. This is extremely useful for future studies and this needs to be highlighted in your article.

We highlighted this aspect in the paper and also formulated a corresponding research question:

- Can the Parsivel constrain a temperature-based mass separation of precipitation into solid and liquid precipitation? How do occurrence and mass fraction depend on temperature?

I suggest adding a discussion section and the conclusion needs also to be rewritten with more emphasis on very important results. In the current form the conclusion repeats a lot of previous results but it is hard to see what are the main conclusions.

We rewrote the conclusions part and hope that the main results are now presented more concisely.

## Comments by reviewer 2

### General Comments

The study investigates precipitation characteristics at Ny-Ålesund, Svalbard, based on ground-based observations from three instruments (Pluvio, Parsivel and MRR), and relates

precipitation to weather systems such as atmospheric rivers, cyclones, and fronts. It also investigates extreme precipitation events and describes one precipitation event in more detail.

The manuscript is generally well written and logically structured, and presents a comprehensive dataset. The data analysis is mainly sufficient, figures are of good quality, and conclusions are supported by the data presented. However, there are some areas which need major improvements, particularly the clarity of the study's motivation, the description of methods, and discussion of implications, see my specific comments. The text should be substantially clarified and improved. With improvements, this study will make a valuable contribution to understanding precipitation in the Arctic.

We have changed the focus of the study and reorganized the manuscript correspondingly. We concentrate now on the Parsivel and Pluvio measurements, leaving out the Micro Rain Radar data since they did not significantly contribute to the study in the way we incorporated the data. We expanded the analysis on the weather events, i.e. atmospheric rivers, cyclones and fronts, and their contribution to precipitation at Ny-Ålesund, which has not been addressed in previous studies yet.

The research questions are now:

- Can the Parsivel constrain a temperature-based mass separation of precipitation into solid and liquid precipitation? How do occurrence and mass fraction depend on temperature?
- How are precipitation amount and type related to large-scale synoptic systems like ARs, cyclones and fronts?
- Which role do these systems play in extreme precipitation events?

We hope that the storyline and the motivation are now clearer.

### **Specific comments**

Introduction:

1. The introduction gives a strong rationale but it is quite general. It should better connect the objectives of this study to gaps in the literature.

We adapted the introduction and formulated clearer objectives of the study resulting in the research questions mentioned above.

Methods:

2. The correction function for precipitation by Wolff et al (2015) is based on measurements made at Haukeliseter, Norway (at above 1000 m altitude). How well does this correction function apply to the conditions in Ny-Ålesund? How did you select this correction function? There are plenty of other correction functions in the literature (see for example Kochendorfer et al. 2017, or Køtzow et al. 2020). Discuss the assumptions or limitations of the selected function and motivate the selection briefly.

Kochendorfer, J. et al: Analysis of single-Alter-shielded and unshielded measurements of mixed and solid precipitation from WMO-SPICE, *Hydrol. Earth Syst. Sci.*, 21, 3525–3542, <https://doi.org/10.5194/hess-21-3525-2017>, 2017.

Køltzow, M. et al: Verification of Solid Precipitation Forecasts from Numerical Weather Prediction Models in Norway. *Wea. Forecasting*, 35, 2279–2292, <https://doi.org/10.1175/WAF-D-20-0060.1>. 2020

We are aware that many correction functions are available. We have chosen the one by Wolff et al. (2015) since it does not require a phase partitioning of the precipitation amount into solid, liquid or mixed before. We mention this explicitly also in the text:

“We also applied an empirical correction function by Wolff et al. (2015) to the 1 min precipitation data to correct for wind-induced precipitation losses. This correction function has been developed based on gauge measurements in southern Norway and depends on temperature and wind speed at gauge height (see Eq. 12 in Wolff et al., 2015). The advantage of this correction function is that it can be directly applied to the total precipitation amount and does not require a mass separation of the precipitation into liquid and solid first. As this paper does not focus on evaluating correction functions, we made a choice here but want to point out that the estimated undercatch strongly depends on the chosen correction function (Champagne et al., 2024).”

We also discuss the impact on the correction function in the new section 3.1. From the comparison with the uncorrected MET Norway precipitation gauge data, we deduce that the correction function by Wolff et al. (2015) likely still underestimates the precipitation amount. As the present study does not focus on the evaluation of correction functions, we plan to have a closer look at different correction functions in the future. Here, we would also like to incorporate the Geonor measurements as they rely on the same measurement principle as the Pluvio and also experience similar measurement conditions (since the two instruments are only about 140 m apart). We added a corresponding paragraph also in the outlook section:

“Still, a few points should be noted regarding the presented analysis. The absolute values of the precipitation amount are still uncertain. As seen from the comparison with the uncorrected Geonor data, the corrected Pluvio measurements (using the algorithm by Wolff et al., 2015) are likely still underestimated. Following Champagne et al. (2024), different correction functions will be applied in the future to better account for the uncertainties of the Pluvio data record. An extended comparison with the processed Geonor precipitation data will provide further insight into the measurement uncertainties.”

3. Clarify which instruments are used for specific characteristics (precipitation amount, frequency, and type). For instance, in Section 2.3, it is currently unclear why MRR data is used or how it complements those from Pluvio and Parsivel.

We reorganized the instrument section. The MRR data are not part of the study anymore.

4. The abbreviations O-AR, O-CY, etc., are introduced in Section 2.4 but not clearly explained. I suggest briefly clarifying these terms when they are first mentioned (O-AR refers to 'only atmospheric rivers'). Additionally, as the use of ERA5 data and the detection of weather events are central to the analysis and conclusions, you should consider creating a dedicated

subsection to explain the detection algorithms and their relevance to the study. This would enhance clarity.

We introduced the abbreviations in section 2.4, which is dedicated to the detection algorithms. We also expanded the explanation of the weather system detection as suggested.

5. Why was Geonor not used in this study? Wouldn't it provide an additional comparison or insights into precipitation measurement uncertainties?

We planned to include the Geonor in the revised version. However, when discussing with Mareile Wolff, we figured out that the processed Geonor data are available for a short period only. The "raw" Geonor data, i.e., the bucket content, still needs to be translated to precipitation amount, for which corrections and quality checks also need to be applied (checks which are already included in the Pluvio software). The precipitation amount is not simply the difference of the bucket content at time step  $i+1$  minus the bucket content at time stamp  $i$ . So, there is not a ready-to-use Geonor data set available. More sophisticated processing steps need to be applied to be able to use the data properly. This is definitely the next step that we would like to take but this requires more time.

### Section 3

6. Small precipitation amounts are the focus of Figure 3 and the paragraph starting on line 240. The importance of this analysis is not clearly motivated. Please explain why studying these small precipitation events is relevant.

We moved this discussion to the section on the weather types (section 4) and hope that the motivation is now clearer.

"Very small precipitation amounts or trace precipitation, i.e., small but immeasurable daily precipitation events, are still challenging for observations and models. Boisvert et al. (2018), who defined trace precipitation as days with less than 1 mm precipitation, showed large differences in the occurrence and annual amount of trace precipitation over the Arctic Ocean between eight reanalyses. However, trace precipitation can make up a substantial proportion of the total precipitation amount over the central Arctic Ocean (Boisvert et al., 2018). The question of whether these small amounts of precipitation that numerical models frequently generate occur also in reality has not yet been completely answered. This is also due to missing accurate reference observations. At Ny-Ålesund, trace precipitation (i.e., non-zero daily precipitation amount  $<1$  mm) is reported from the corrected Pluvio data for about 16% of the time of the analyzed period. It accounts for 44% of the days with precipitation recorded. Trace precipitation is thus a common feature of the atmospheric state at Ny-Ålesund. The annual trace precipitation amounts for 2018-2021 are between 20 to 30 mm. Compared to the annual precipitation amount, these values are rather small. For example, for 2021, the annual trace precipitation amount is 5.5% of the total precipitation amount at Ny-Ålesund. Days with trace precipitation can be mainly related to the residual class (43%) followed by cyclone-related events, in particular with the O-CY class (18%). Focusing more on processes on the local scale, trace precipitation could also be associated with the frequent occurrence of low-level mixed-phase clouds in conjunction with katabatic winds (Gierens et al., 2020), with the dry katabatic flow leading to the sublimation of a large portion of the precipitating mass."

And in the conclusions section:

“As these models often produce a lot of small, potentially artificial precipitation amounts, it would be interesting to look more into the trace precipitation events. While these events are probably the most challenging ones for precipitation gauge observations, in particular for classical manual gauges, the higher sensitivity of the Parsivel might be beneficial. Also, additional observations from the cloud and micro rain radar will be helpful in identifying blowing snow events that might be falsely interpreted as precipitation.”

7. Lines 290–302 discuss mixed-phase precipitation but do not address sub-zero liquid precipitation, which also occurs. Is this considered in your analysis?

As the first reviewer mentioned that a mixed-phase precipitation class is not helpful for many studies, we revised our phase discrimination strategy to come up with solid and liquid precipitation classes only. Please see also the reply to the comment of reviewer 1 with respect to the lines 314-315.

The Parsivel does not indicate a lot of sub-zero liquid precipitation (see Fig. 5). We think that the enhanced liquid occurrence around  $-3$  to  $-2$  °C is an artifact (as discussed in section 3.2). This is why we do not assume liquid precipitation for sub-zero temperatures.

8. Could additional data sources validate precipitation types from Parsivel? For instance, the video data you mention or manual observations (SYNOP/METAR)?

To further incorporate the measurements of the video in-situ snowfall sensor (VISSS) is definitely the next step. It will be interesting to see how well this data can be used to evaluate the Parsivel precipitation classes. However, VISSS measurements started only in the autumn of 2021. We are thus planning to use the data in the evaluation for the more recent years.

SYNOP data might be more challenging to use due to the different temporal resolution and thus, representativity of the observation. We are not sure if such a comparison will provide us with more insights.

Currently, a Thies disdrometer is operated by the University of Leipzig near the balloon hall about 30 m away from the Parsivel. The comparison between these two instruments will help us to better understand the performance of the disdrometers, at least to understand how consistent the measurements of the two instruments are. The VISSS data can also here be used as a reference. We added a paragraph in the outlook section in this respect:

“With the measurements of the video in situ snowfall sensor, which was installed in September 2021, these cases can be analyzed in more detail in the future. This might allow for a more detailed evaluation of precipitation type from Parsivel or even help to establish an improved (and open source) retrieval method for precipitation type, which could also directly incorporate temperature information as a further constraint. In February 2025, a Thies disdrometer was operated by the University of Leipzig close to the balloon hall about 30 m away from the Parsivel. A comparison of the detected precipitation and precipitation phase will shed further light on the accuracy of the disdrometer-derived precipitation phase classification.”

9. Line 346: How was the height of 120m selected? Can precipitation detected at this height reliably represent surface precipitation? What uncertainties are associated with this approach? Discuss, and modify the methods section accordingly.

Obsolete since removed in the revised version.

#### Section 4

10. Line 401: "for which Ze values precipitation is actually detected on the ground" is a critical question that applies to previous sections as well (e.g., precipitation frequency analysis). Please address this earlier in the text.

Obsolete since removed in the revised version.

11. Lines 401–406: Results are described but not explicitly interpreted. Connect these findings to the question you are trying to answer. For example, explicitly address how these Ze values relate to surface precipitation detection.

Obsolete since removed in the revised version.

12. Figure 10: I am not sure about the journal recommendations for figures, but for me, it would be easier if a legend was added directly in the figure, not just the caption. This applies to other figures as well, but it is especially important here because of the number of lines in the plot.

We revised the figures in general and added further legends to the plots.

13. Captions in general: Indicate which data sources the figures are based on. While this becomes clear when reading the text, captions alone should provide this information.

We revised the figure captions and included all necessary information.

14. The analysis of extreme precipitation cases is valuable, but the manuscript refers too much to future studies. For example, on line 441, avoid starting with a reference to a follow-up work. Focus on the results gained from these cases now, such as the role of ARs.

We revised the analysis and wording and focused more on the results presented. Please see also the corresponding section in the revised version (last 2 paragraphs of section 4).

#### Conclusions:

15. Clearly state the main conclusions. Right now, they are mixed with comments about limitations and future work, which makes it hard to focus on the key messages. I suggest putting limitations and future work into separate paragraphs.

In the conclusion section, the results are now presented in a more concise way: First, the results of the precipitation phase partitioning method are summarized followed by a discussion and outlook in this respect. Then, the results of the weather system analysis are summarized and discussed and an outlook is given.



16. Line 473: The statement "Large-scale weather events like ARs and cyclones are common features at Ny-Ålesund" appears to contradict the statement on lines 473–474 about ARs occurring only 8% of the time. Please clarify.

This statement has been removed.

17. Line 486: The reference to "In many studies" is vague. Specify which studies base precipitation type solely on temperature thresholds.

We added corresponding references.

18. Discuss how your findings contribute to current knowledge about Arctic precipitation, as introduced earlier in the manuscript. How do they advance our understanding of precipitation processes in the Arctic climate? I would like to see more discussion on what these results mean and what the community can learn from this study.

We revised the introduction and summary and conclusions sections. We hope that the new aspects and the key results of the study are much clearer now. We would refer the reviewer here to the corresponding sections 1 and 5.

19. Specifically, you mention model uncertainties in the introduction. Could your observations help improve understanding and even improving models? What are the potential applications for the modeling community?

The additional Pluvio observations will help to better describe the uncertainties in gauge-based precipitation observations. These uncertainties are crucial when observations are compared to model output and differences interpreted. Comparing the precipitation observations of the various locations in and outside of Ny-Ålesund will also help to better understand the local variability of the precipitation measurements and the representativity of these observations keeping the horizontal resolution of the model in mind.

Two specific aspects might also be of particular interest: the phase partitioning in models (and the dependency on temperature), as well as the frequent occurrence of trace precipitation in models. Currently it is unclear if trace precipitation events in models are artifacts or not. Here, the Pluvio and Parsivel measurements can contribute with more detailed observations having a higher sensitivity as traditional manual precipitation gauges.

We have added a paragraph on the importance of the precipitation phase, the temperature dependency and current limitations in the in the introduction. Trace precipitation is addressed in section 4 in more detail. We come back to these two topics also in the conclusion section.

#### **Minor issues**

Line 27: "the Svalbard archipelago ... reveals the highest temperature increase" sounds strange. → The Svalbard archipelago exhibits, or has experienced.

We corrected the verb to "has experienced".

Figure 2 caption: Clarify that the hatched areas denote months with significant data gaps.

We added this information to the figure caption.

Line 475: Remove the extra ) after Ny-Ålesund.

changed

### **Community Comment by Hans-Werner Jacobi:**

Dear authors:

I stumbled over the following statement in the introduction: "A recent study by Zhou et al. (2024) revealed that the Arctic warming between 1979 and 2001 is three times higher than the global warming." I think this is a misinterpretation of the Zhou et al. paper. First of all, they analyse data (observations and model results) for 30 year periods or longer. I could not find any information on the mentioned 22 year period from 1979 to 2001. Moreover, Zhou et al. calculate from observations a 3.98 faster warming for the period from 1980 to 2014, which increased even further for more recent period (see their Figure 1a). In my opinion, there is no doubt that since ~1980 the observed warming in the Arctic was approximately four times faster than the global warming as already demonstrated in other studies. By comparing with model results, Zhou et al. further conclude that the Arctic Amplification should lead to an "only" 3 times faster warming in the Arctic and that the recent accelerated warming in the Arctic is related to natural variability. This means that in the long term the accelerated warming in the Arctic can be expected to fall below a factor of 3. However, this does not undermine that in the last 40 years the observed warming in the Arctic was ~4 times faster than the global warming. I think the initial statement in the introduction rather leads to confusion and should be rectified.

Citation: <https://doi.org/10.5194/egusphere-2024-3368-CC1>

Dear Hans-Werner, thank you for pointing out this mistake. The information from the two papers has been mixed up incorrectly. We changed the sentence to:

"Recent studies have shown that Arctic warming during the last decades was four times higher than global warming (Zhou et al., 2024; Rantanen et al., 2022)."
